# Supplementary material for: Advancing PET through Direct Imaging of Three-Photon Decay using Pure Positron Emitters
Source: Research Square preprint supplement (doi:10.21203/rs.3.rs-7272322/v1), 2025-12-03
Supplement: Supplementary file 1 [file fd46cfb86e8dd80292809d98.pdf]

## Supplementary Note: Detailed derivation of tri-angular localization of the $3\gamma$ annihilation point

Here, we derive the localization of the  $3\gamma$  annihilation point in detail. The three-photon decay process conserves both energy and momentum. Accordingly, the total energy of the three emitted photons,  $E_1$ ,  $E_2$ , and  $E_3$ , must satisfy:

$$E_1 + E_2 + E_3 = 1.022 \text{ MeV} \quad (1)$$

$$0 \text{ keV} \leq E_1, E_2, E_3 \leq 511 \text{ keV} \quad (2)$$

Due to momentum conservation, all three photons must be coplanar. The conservation of momentum in the  $E_1$  and its vertical directions can be written as:

$$\begin{cases} E_1 + E_2 \cos \theta_{12} + E_3 \cos (\theta_{12} + \theta_{23}) = 0 \\ E_2 \sin \theta_{12} + E_3 \sin (\theta_{12} + \theta_{23}) = 0 \end{cases} \quad (3)$$

Eliminating  $\theta_{23}$ , we get:

$$\begin{aligned} E_3^2 &= (E_1 + E_2 \cos \theta_{12})^2 + (E_2 \sin \theta_{12})^2 \\ &= E_1^2 + 2E_1 E_2 \cos \theta_{12} + E_2^2 \end{aligned} \quad (4)$$

Therefore,

$$\cos \theta_{12} = \frac{-E_1^2 - E_2^2 + E_3^2}{2E_1 E_2} \quad (5)$$

This leads to generalized relationship between the emission angle and the photon energy:

$$\theta_{ij} = \arccos \left( \frac{-E_i^2 - E_j^2 + E_k^2}{2E_i E_j} \right) \quad (6)$$

$$(i, j, k) \in \{(1, 2, 3), (2, 3, 1), (3, 1, 2)\} \quad (7)$$

To solve this problem, we propose a method that reduces the problem to a quadratic equation, allowing for the straightforward elimination of extraneous solutions.

First, the 2D plane shown in figure 2(a) is mapped into a complex plane as shown in figure 2(b). Let  $P_1$ ,  $P_2$ , and  $P_3$  denote the detector positions, each detecting a photon with energies  $E_1$ ,  $E_2$ , and  $E_3$  respectively, in coincidence. The decay position  $Q$  can then be determined as the intersection point of two circles, defined in the complex plane, where  $P_1$ ,  $P_2$ , and  $P_3$  are arranged counterclockwise.

The angle  $\theta_{ij}$  can be calculated from the measurements of energy  $E_1$ ,  $E_2$ , and  $E_3$ . The positions of the photons detected with energies  $E_1$ ,  $E_2$ , and  $E_3$  are denoted as  $P_1$ ,  $P_2$ , and  $P_3$ , and the reconstructed position is denoted as  $Q$ . After rearranging the situation, it can be seen that the coordinate system is comparatively simple. The coordinate system is a complex plane, and  $P_1$ ,  $P_2$ ,

and  $P_3$  are arranged around the counterclockwise direction. Furthermore, the point  $Q$  is located within the triangular shape formed by  $P_1$ ,  $P_2$ , and  $P_3$ .

Two circles are considered:  $C_1$ , which subtends a central angle  $\theta_{12}$  across the chord  $P_1P_2$ , and  $C_2$ , which subtends an angle  $\theta_{23}$  across  $P_2P_3$ . The emission point  $Q$  corresponds to the intersection of these two circles, excluding the trivial intersection point at  $P_2$ . The centers of these two circles are complex numbers  $D_1$  and  $D_2$  with radii  $r_1$  and  $r_2$ , respectively. The complex numbers are denoted by capital letters, while the radii are represented by lowercase letters.

Two cases can be considered: when  $D_1$  is outside and when  $D_1$  is inside the triangle  $P_1P_2P_3$ . The equations in both cases are as follows:

$$P_1 - D_1 = e^{-2i\theta_{12}}(P_2 - D_1) \quad (8)$$

After simplifying this, and doing so similarly for  $D_2$ , we get the following expression for  $D_1$  and  $D_2$ :

$$D_1 = \frac{P_1 - P_2 e^{-2i\theta_{12}}}{1 - e^{-2i\theta_{12}}} \quad (9)$$

$$D_2 = \frac{P_2 - P_3 e^{-2i\theta_{23}}}{1 - e^{-2i\theta_{23}}} \quad (10)$$

Next, for  $r_1$  and  $r_2$ , we can calculate the distances as follows:

$$r_1 = |P_1 - D_1| \quad (11)$$

$$r_2 = |P_2 - D_2| \quad (12)$$

Now, using these distances  $D_1, D_2, r_1, r_2$ , we can calculate  $Q$  as follows:

$$|Q - D_1| = r_1 \quad (13)$$

$$|Q - D_2| = r_2 \quad (14)$$

By expanding these two equations, we obtain:

$$|Q|^2 - Q\overline{D_1} - \overline{Q}D_1 + |D_1|^2 = r_1^2 \quad (15)$$

$$|Q|^2 - Q\overline{D_2} - \overline{Q}D_2 + |D_2|^2 = r_2^2 \quad (16)$$

Now, rearranging these expressions gives:

$$\overline{Q} = \frac{-\overline{D_{12}}Q + e}{D_{12}} \quad (17)$$

$$e \equiv |D_1|^2 - |D_2|^2 - (r_1^2 - r_2^2) \quad (18)$$

$$D_{12} \equiv D_1 - D_2 \quad (19)$$

Substituting into eq. (15) and simplifying with respect to  $Q$ , we get:

$$-\overline{D_{12}}^2 Q^2 + (e - \overline{D_1}D_{12} + D_1\overline{D_{12}})Q - eD_1 + D_{12}(|D_1|^2 - r_1^2) = 0 \quad (20)$$

This equation can be solved for the real or imaginary parts of  $Q$ . By rewriting each complex variable as  $Q = x + yi$  and  $D_{12} = d_x + id_y$ , the eq. (17) can be written as:

$$x + yi = \frac{-(d_x - d_y i)(x + yi) + e}{d_x + d_y i} \quad (21)$$

Solving for  $y$  gives:

$$y = \frac{-2d_x x + e}{2d_y} \quad (22)$$

For practical analysis, we assume that  $d_y \neq 0$ , which is generally the case in practice. Then, eq. (20) can be reduced to two real quadratic equations of  $x$ .

In order to avoid dealing with the messy coefficients, we consider a generalized case where

$$Z = x + yi \quad (23)$$

$$y = sx + t \quad (24)$$

$$A_1 Z^2 + A_2 Z + A_3 = 0 \quad (25)$$

Here,  $A_1, A_2, A_3$  are arbitrary complex numbers:

$$A_1 = a_{x1} + a_{y1}i, \quad A_2 = a_{x2} + a_{y2}i, \quad A_3 = a_{x3} + a_{y3}i \quad (26)$$

Thus, we get:

$$(a_{x1} + a_{y1}i)Z^2 + (a_{x2} + a_{y2}i)Z + (a_{x3} + a_{y3}i) = 0 \quad (27)$$

Substituting  $z = x + (sx + t)i$  and rearranging the real and imaginary parts, we get the following equations. For the real part:

$$(a_{x1} - a_{x1}s^2 - 2a_{y1}s)x^2 + (-2a_{x1}st - 2a_{y1}t + a_{x2} - a_{y2})x - a_{x1}t^2 + a_{x3} = 0 \quad (28)$$

For the imaginary part:

$$(a_{y1} - a_{y1}s^2 + 2a_{x1}s)x^2 + (-2a_{x1}st + 2a_{x2}x - a_{x3})x - a_{x2}t^2 + a_{y3} = 0 \quad (29)$$

Next, applying the generalized form in eqs. (20) and (22), we have:

$$A_1 = -\overline{D_{12}} \quad (30)$$

$$A_2 = e - \overline{D_{12}}D_{12} + D_{12}\overline{D_{12}} \quad (31)$$

$$A_3 = -eD_{12} + D_{12}(|D_{12}|^2 - r_1^2) \quad (32)$$

$$s = -\frac{d_x}{d_y}, \quad t = \frac{e}{2d_y} \quad (33)$$

This allows us to calculate the coefficients in eqs. (28) and (29). Using a program to solve these two equations, we find that the solutions are almost identical, so the experiment was conducted using the assumption that the real part is equal to zero.

From the above process, the position of  $Q(x, y)$  can be reconstructed from  $E_1, E_2, E_3, P_1, P_2, P_3$ . One of the solution corresponds to  $P_2$ , so the determination of  $Q$  is easy.

Finally, the conditions that are necessary in this method can be summarized as follows, and in the actual experiment, we perform the following adjustments in the program:

1.  $P_1, P_2, P_3$  are arranged in counterclockwise order around the time circle.
2.  $d_y$  is not zero.
